# Supplementary material for: Magnetic polydopamine decorated with Mg–Al LDH nanoflakes as a novel bio-based adsorbent for simultaneous removal of potentially toxic metals and anionic dyes
Source: Royal Society of Chemistry journal article supplement (doi:10.1039/c5ta09132b), 2015-12-23
Supplement: c5ta09132b2.pdf [file c5ta09132b2.pdf]

## Supporting Information For

### **Magnetic polydopamine decorated with Mg-Al-LDH nanoflakes as a novel bio-based adsorbent for simultaneous removal of heavy metals and anionic dyes**

Jie Li,<sup>acd</sup> Qiaohui Fan<sup>b</sup>, Yijin Wu,<sup>c</sup> Xiangxue Wang<sup>acd</sup>, Changlun Chen,<sup>d,e</sup> Zhiyong Tang,<sup>c\*</sup> and Xiangke Wang<sup>aef\*</sup>

---

<sup>a</sup> *School of Environment and Chemical Engineering, North China Electric Power University, Beijing 102206, P. R. China.*

<sup>b</sup> *Key Laboratory of Petroleum Resources, Gansu Province / Key Laboratory of Petroleum Resources Research, Institute of Geology and Geophysics, Chinese Academy of Sciences, Lanzhou 730000, P.R. China*

<sup>c</sup> *Laboratory for Nanomaterials National Center for Nanoscience and Technology Beijing, 100190, P. R. China*

<sup>d</sup> *Key Laboratory of Novel Thin Film Solar Cells, Institute of Plasma Physics, Chinese Academy of Sciences, Hefei 230031, P. R. China.*

<sup>e</sup> *Collaborative Innovation Center of Radiation Medicine of Jiangsu Higher Education Institutions, School for Radiological and Interdisciplinary Sciences, Soochow University, Suzhou 215123, P.R. China*

<sup>f</sup> *NAAM Research Group, Faculty of Science, King Abdulaziz University, Jeddah 21589, Saudi Arabia*

---

\*Corresponding author. E-mail: [xkwang@ncepu.edu.cn](mailto:xkwang@ncepu.edu.cn) (X. Wang); [zytang@nanoctr.cn](mailto:zytang@nanoctr.cn) (Z. Tang).

**Table S1** Theoretical and calculated  $C_s$  values, pseudo-second-order rate constants,  $k_2$ , and correlation coefficient values ( $R^2$ )

|                                                | Theoretical $C_s$ (mg/g) | Calculated $C_s$ (mg/g) | $k_2$ (mg/(mg min)) |
|------------------------------------------------|--------------------------|-------------------------|---------------------|
| LDH, $C_{Cu(II)}=20$ mg/L                      | 19.1                     | 20.5                    | 1.5                 |
| MPL <sub>3</sub> , $C_{Cu(II)}=4$ mg/L         | 22.5                     | 25.8                    | 2.3                 |
| Cu(II) MPL <sub>3</sub> , $C_{Cu(II)}=10$ mg/L | 47.9                     | 28.2                    | 1.2                 |
| MP, $C_{Cu(II)}=20$ mg/L                       | 54.1                     | 59.5                    | 1.6                 |
| MPL <sub>3</sub> , $C_{Cu(II)}=20$ mg/L        | 67.7                     | 67.1                    | 7.6                 |
| MPL <sub>3</sub> , MO                          | 200.1                    | 198.4                   | 0.1                 |
| MPL <sub>3</sub> , CR                          | 170.6                    | 165.4                   | 0.1                 |

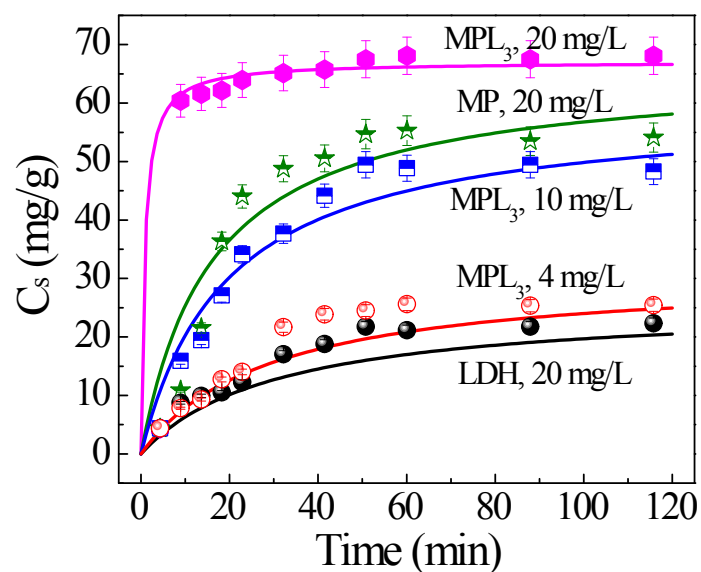

**Fig. S1** Time profile of Cu(II) removal by the LDH, MP and MPL<sub>3</sub> assembly at pH = 5.6 ± 0.1, I

= 0.01M NaNO<sub>3</sub>, m/V = 0.1 g/L.

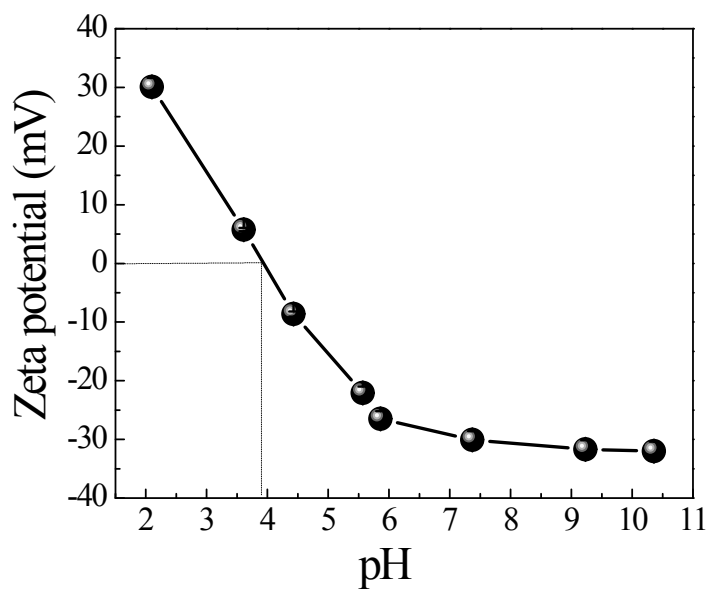

Fig. S2 Zeta potentials of the MPL<sub>3</sub> assembly as a function of solution pH.

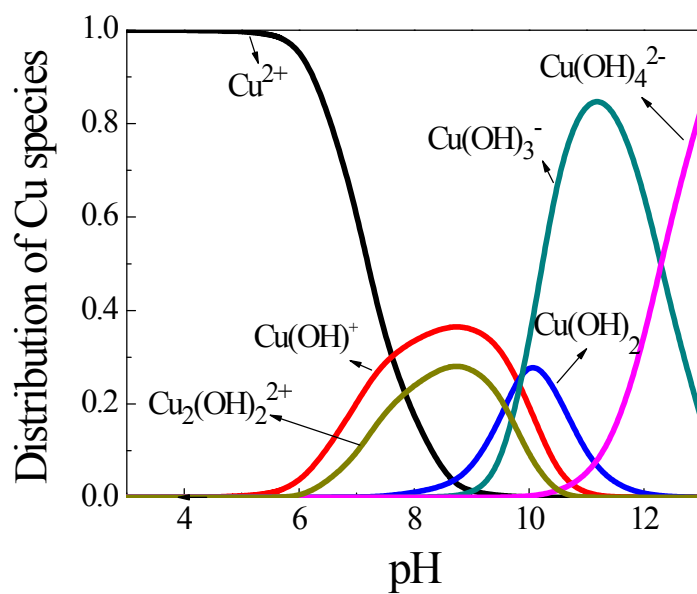

Fig. S3 Distribution of Cu(II) species as a function of pH based on the equilibrium constants.

**Table S2** Physicochemical characteristics of the studied dyes

| Dyes | Molecular structure                                                               | Dimensions (nm) | Molecular weight | $\lambda_{\max}$ (nm) |
|------|-----------------------------------------------------------------------------------|-----------------|------------------|-----------------------|
| MO   | 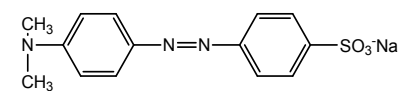 | 1.31×0.55×0.18  | 327              | 465                   |
| CR   |  | 2.62×0.74×0.43  | 697              | 695                   |

**Table S3** Parameters for Langmuir and Freundlich isotherm models

|                           | Langmuir model           |            |       | Freundlich model                               |       |       |
|---------------------------|--------------------------|------------|-------|------------------------------------------------|-------|-------|
|                           | $C_s \text{ max}$ (mg/g) | $b$ (L/mg) | $R^2$ | $K_F$ ( $\text{mg}^{1-n}\text{L}^n/\text{g}$ ) | $n$   | $R^2$ |
| MPL <sub>3</sub> , Cu(II) | 75.013                   | 2.523      | 0.923 | 44.607                                         | 0.208 | 0.984 |
| MPL <sub>3</sub> , Cd(II) | 65.812                   | 0.158      | 0.969 | 16.437                                         | 0.476 | 0.985 |
| MPL <sub>3</sub> , Pb(II) | 55.517                   | 0.277      | 0.979 | 15.024                                         | 0.394 | 0.993 |
| MPL <sub>3</sub> , MO     | 624.893                  | 0.025      | 0.897 | 344.843                                        | 0.544 | 0.995 |
| MPL <sub>3</sub> , CR     | 584.563                  | 0.024      | 0.925 | 276.662                                        | 0.157 | 0.988 |
| LDH, Cu(II)               | 23.909                   | 0.470      | 0.964 | 8.563                                          | 0.379 | 0.973 |
| LDH, Cd(II)               | 21.489                   | 0.425      | 0.973 | 7.201                                          | 0.404 | 0.989 |
| LDH, Pb(II)               | 19.745                   | 0.136      | 0.956 | 3.079                                          | 0.568 | 0.961 |

**Table S4** Summary of Cu(II), MO and CR adsorption isotherm constants and characteristics for the binary-solute Freundlich isotherm

| Dye concentration (mg/L) | 0                                              | 30     | 90     | 150    |        |
|--------------------------|------------------------------------------------|--------|--------|--------|--------|
| Cu(II)+MO                |                                                |        |        |        |        |
| Cu(II)                   | $K_F$ ( $\text{mg}^{1-n}\text{L}^n/\text{g}$ ) | 44.607 | 45.727 | 50.136 | 55.425 |
|                          | $n$                                            | 0.208  | 0.491  | 0.613  | 0.392  |
|                          | $R^2$                                          | 0.984  | 0.978  | 0.981  | 0.987  |
| Cu(II)+CR                |                                                |        |        |        |        |
| Cu(II)                   | $K_F$ ( $\text{mg}^{1-n}\text{L}^n/\text{g}$ ) | 44.607 | 48.835 | 55.321 | 64.083 |
|                          | $n$                                            | 0.208  | 0.316  | 0.505  | 0.418  |
|                          | $R^2$                                          | 0.984  | 0.976  | 0.982  | 0.975  |

**Table S5** Summary of competition coefficients for the binary systems

| $a_{ij}$         |    | Dye concentration (mg/L) |      |      |      |
|------------------|----|--------------------------|------|------|------|
|                  |    | 0                        | 30   | 90   | 150  |
| i+j<br>Cu(II)+MO | 5  | 0                        | 3.21 | 3.56 | 3.98 |
|                  | 10 | 0                        | 2.34 | 2.76 | 3.01 |
|                  | 15 | 0                        | 1.32 | 1.68 | 1.73 |

  

| $a_{ij}$         |    | Dye concentration (mg/L) |      |      |      |
|------------------|----|--------------------------|------|------|------|
|                  |    | 0                        | 30   | 90   | 150  |
| i+j<br>Cu(II)+CR | 5  | 0                        | 3.54 | 3.87 | 4.06 |
|                  | 10 | 0                        | 1.23 | 1.34 | 3.15 |
|                  | 15 | 0                        | 0.45 | 0.67 | 1.98 |

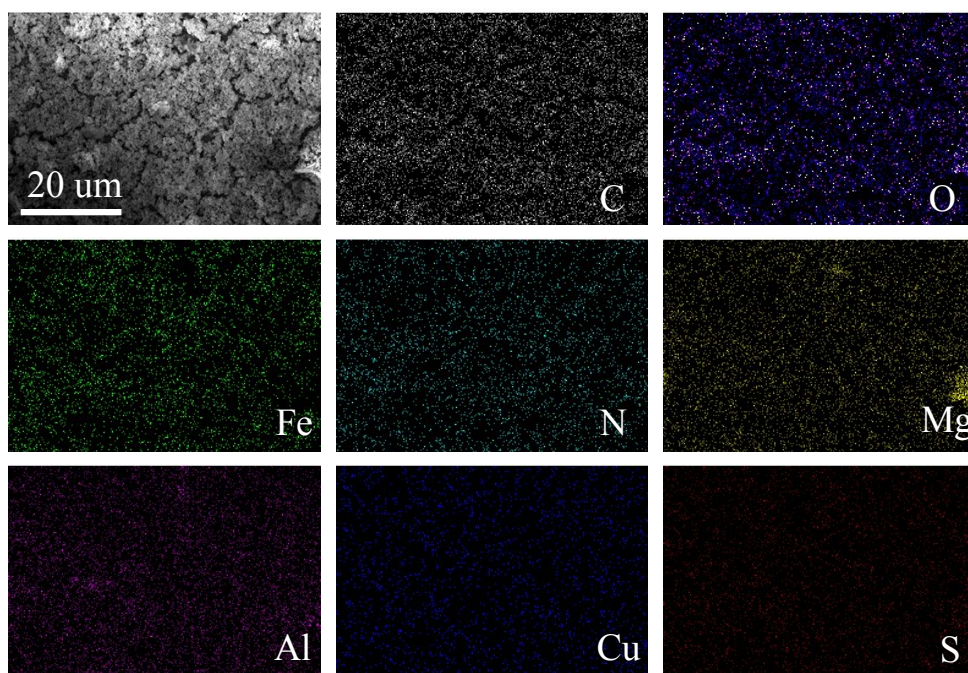

**Fig. S4** SEM image and the elemental distribution mapping of MPL<sub>3</sub> assembly after simultaneous

removal of Cu(II) and MO (initial concentration: 10 mg/L Cu(II) and 100 mg/L MO).

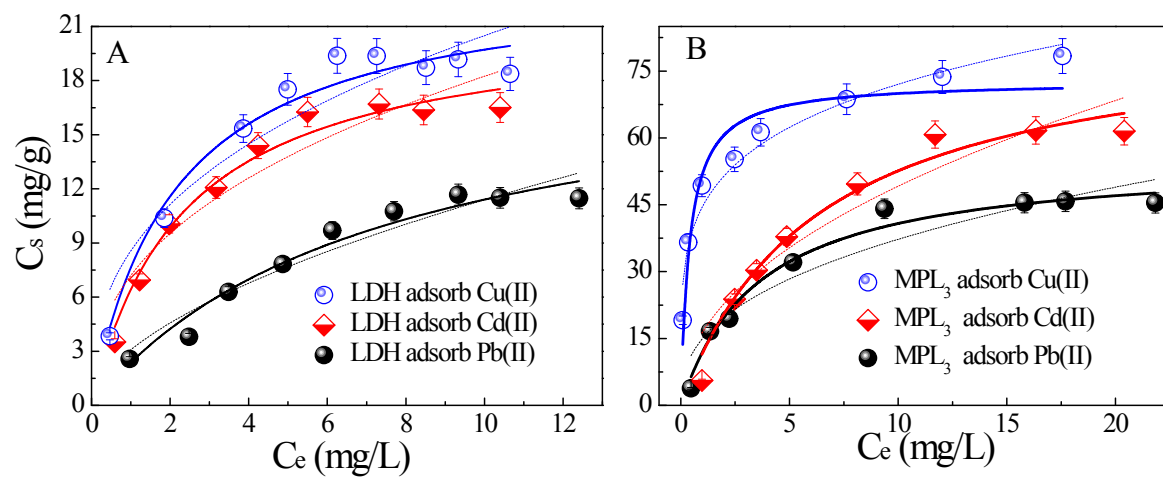

Fig. S5 Removal isotherm of different metal ions onto LDH (A) and  $MPL_3$  assembly (B)

simulated by the Langmuir model (solid line) and Freundlich model (dash line).  $pH = 5.6 \pm 0.1$ ,  $I$

$= 0.01M NaNO_3$ ,  $m/V = 0.1 g/L$ .

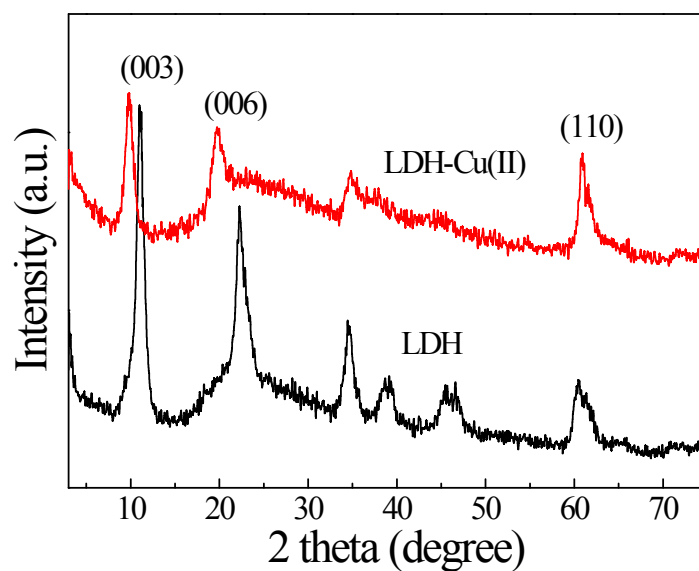

Fig. S6 XRD patterns of LDH before and after the removal of Cu(II).

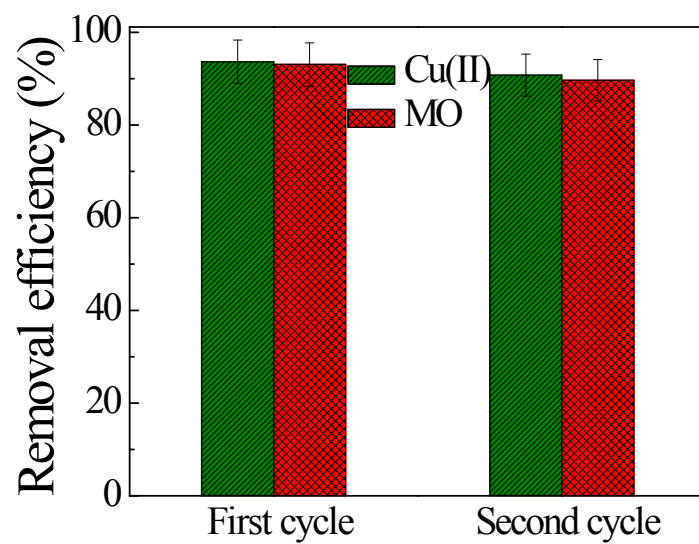

**Fig. S7** Evaluating the removal efficiency and reusability of MPL<sub>3</sub> assembly in model textile effluent.
